# Supplementary material for: CLIF–SOFA score and SIRS are independent prognostic factors in patients with hepatic encephalopathy due to alcoholic liver cirrhosis
Source: PubMed Central journal article supplement — Medicine (Baltimore). 2016 Jul 1;95(26):e3935. doi: 10.1097/MD.0000000000003935 (PMC4937904; doi:10.1097/md.0000000000003935), 2016-07-01
Supplement: medi-95-e3935-s001.pdf [file medi-95-e3935-s001.pdf]

**Supplemental Digital Content.** Univariate Cox proportional hazard models for 30-day mortality

|                                                      | Surviving patients (n=98) | Deceased patients (n=7) | Hazard ratio | 95% CI        | P value |
|------------------------------------------------------|---------------------------|-------------------------|--------------|---------------|---------|
| Age, years ( $\pm$ SD)                               | 58.2 (10.1)               | 51.6 (4.4)              | 0.92         | 0.84-1.01     | 0.10    |
| Male gender, n (%)                                   | 89 (90.8)                 | 7 (100)                 | 22.98        | 0-2864564.97  | 0.60    |
| Diabetes mellitus, n (%)                             | 31 (31.6)                 | 1 (14.3)                | 0.41         | 0.05-3.43     | 0.41    |
| Hypertension, n (%)                                  | 9 (9.2)                   | 0 (0)                   | 0.04         | 0-3112.39     | 0.58    |
| No abstinence of alcohol, n (%)                      | 52 (53.1)                 | 4 (57.1)                | 1.18         | 0.27-5.28     | 0.83    |
| Dialysis, n (%)                                      | 1 (1.0)                   | 0 (0)                   | 0.05         | 0-5.79        | 0.86    |
| transjugular intrahepatic portosystemic shunt, n (%) | 2 (2.0)                   | 0 (0)                   | 0.05         | 0-463997451.9 | 0.80    |
| High grade of HE, n (%)                              | 41 (41.8)                 | 6 (85.7)                | 7.99         | 0.96-66.39    | 0.05    |
| Uncontrolled Ascites, n (%)                          | 26 (26.5)                 | 4 (57.1)                | 3.60         | 0.81-16.09    | 0.09    |
| Spontaneous bacterial peritonitis, n (%)             | 3 (3.1)                   | 1 (14.3)                | 4.66         | 0.56-38.78    | 0.15    |
| Varix bleeding, n (%)                                | 10 (10.2)                 | 1 (14.3)                | 1.44         | 0.17-11.97    | 0.74    |
| Child Pugh class, n (%)                              |                           |                         |              |               |         |
| A and B                                              | 34 (34.7)                 | 0 (0)                   | 1            |               |         |
| C                                                    | 64 (65.3)                 | 7 (100)                 | 39.53        | 0.06-26712.77 | 0.27    |
| Hemoglobin, n (%)                                    |                           |                         |              |               |         |
| > 8 g/dl                                             | 91 (92.9)                 | 7 (100)                 | 1            |               |         |
| $\leq$ 8 g/dl                                        | 7 (7.1)                   | 0 (0)                   | 0.05         | 0-37276.31    | 0.66    |
| Platelet, n (%)                                      |                           |                         |              |               |         |
| > 102,000 /mm <sup>3</sup>                           | 43 (43.9)                 | 4 (57.1)                | 1            |               |         |
| $\leq$ 102,000 /mm <sup>3</sup>                      | 55 (56.1)                 | 3 (42.9)                | 0.54         | 0.12-2.41     | 0.42    |
| Protein, n (%)                                       |                           |                         |              |               |         |
| > 6.7 g/dl                                           | 49 (50.0)                 | 2 (28.6)                | 1            |               |         |
| $\leq$ 6.7 g/dl                                      | 49 (50.0)                 | 5 (71.4)                | 2.41         | 0.47-12.44    | 0.29    |

|                                   |           |          |      |            |      |  |
|-----------------------------------|-----------|----------|------|------------|------|--|
| Albumin, n (%)                    |           |          |      |            |      |  |
| > 2.6 g/dl                        | 64 (65.3) | 2 (28.6) | 1    |            |      |  |
| ≤ 2.6 g/dl                        | 34 (34.7) | 5 (71.4) | 4.70 | 0.91-24.22 | 0.07 |  |
| Aspartate Aminotransferase, n (%) |           |          |      |            |      |  |
| < 84 U/L                          | 65 (66.3) | 3 (42.9) | 1    |            |      |  |
| ≥ 84 U/L                          | 33 (33.7) | 4 (57.1) | 2.39 | 0.53-10.66 | 0.26 |  |
| Alanine transaminase, n (%)       |           |          |      |            |      |  |
| < 29 U/L                          | 48 (49.0) | 4 (57.1) | 1    |            |      |  |
| ≥ 29 U/L                          | 50 (51.0) | 3 (42.9) | 0.71 | 0.16-3.19  | 0.66 |  |
| Sodium, n (%)                     |           |          |      |            |      |  |
| > 135 mmol/L                      | 46 (46.9) | 3 (42.9) | 1    |            |      |  |
| ≤ 135 mmol/L                      | 52 (53.1) | 4 (57.1) | 1.13 | 0.25-5.03  | 0.88 |  |
| Potassium, n (%)                  |           |          |      |            |      |  |
| > 4.5 mmol/L                      | 40 (40.8) | 4 (57.1) | 1    |            |      |  |
| ≤ 4.5 mmol/L                      | 58 (59.2) | 3 (42.9) | 0.58 | 0.13-2.61  | 0.48 |  |
| Ammonia, n (%)                    |           |          |      |            |      |  |
| < 200 µg/dl                       | 59 (60.2) | 3 (42.9) | 1    |            |      |  |
| ≥ 200 µg/dl                       | 39 (39.8) | 4 (57.1) | 1.96 | 0.44-8.78  | 0.38 |  |
| Blood urea nitrogen, n (%)        |           |          |      |            |      |  |
| < 26.2 mg/dl                      | 62 (63.3) | 2 (28.6) | 1    |            |      |  |
| ≥ 26.2 mg/dl                      | 36 (36.7) | 5 (71.4) | 3.75 | 0.73-19.32 | 0.11 |  |
| Creatinine, n (%)                 |           |          |      |            |      |  |
| < 1.5 mg/dl                       | 74 (75.5) | 3 (42.9) | 1    |            |      |  |
| ≥ 1.5 mg/dl                       | 24 (24.5) | 4 (57.1) | 3.49 | 0.78-15.58 | 0.10 |  |
| C-reactive protein, n (%)         |           |          |      |            |      |  |
| < 6 mg/dl                         | 50 (51.0) | 3 (42.9) | 1    |            |      |  |

|                         |           |          |      |           |      |
|-------------------------|-----------|----------|------|-----------|------|
| ≥ 6 mg/dl               | 48 (49.0) | 4 (57.1) | 1.33 | 0.30-5.92 | 0.71 |
| pH, n (%)               |           |          |      |           |      |
| > 7.48                  | 57 (58.2) | 5 (71.4) | 1    |           |      |
| ≤ 7.48                  | 41 (41.8) | 2 (28.6) | 0.52 | 0.10-2.67 | 0.43 |
| Culture results, n (%)  |           |          |      |           |      |
| Negative, not performed | 83 (84.7) | 6 (85.7) | 1    |           |      |
| Positive                | 15 (15.3) | 1 (14.3) | 0.88 | 0.11-7.28 | 0.90 |

---
